# Supplementary material for: Sex-Related Motor Deficits in the Tau-P301L Mouse Model
Source: MDPI journal article supplement (doi:10.3390/biomedicines9091160), 2021-09-04
Supplement: s1 [file s1]

## Supplementary Material

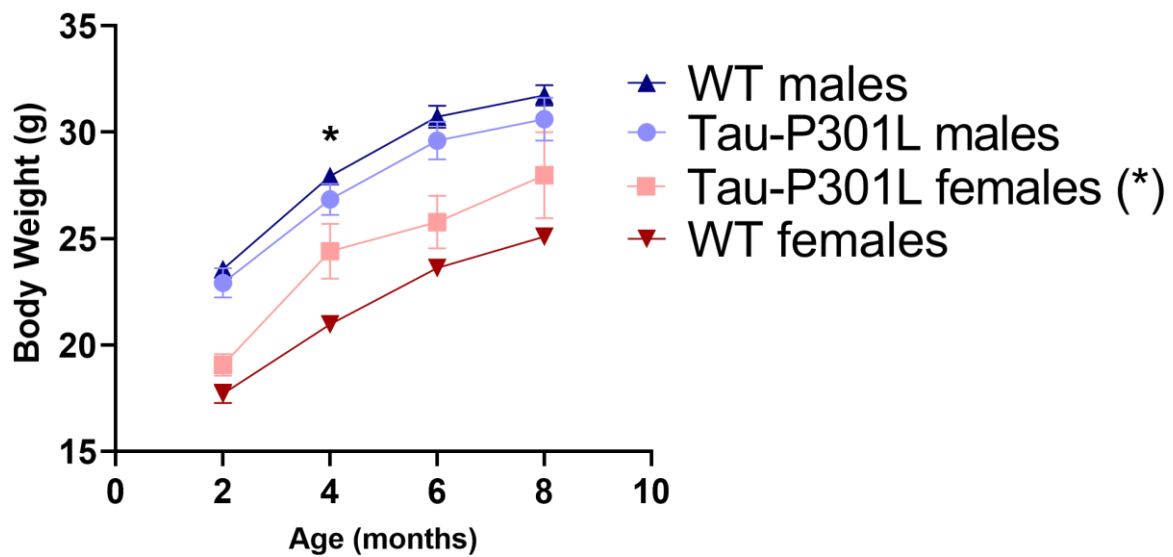

**Figure S1:** Tau-P301L mice had similar body weight compared to WT mice. Tau-P301L male mice (n = 12) did not differ from age-matched WT male mice (n = 12) in the body weight. Tau-P301L female mice (n = 7) had higher body weight only at 4 months of age compared to age-matched WT female mice (n = 7; \*: p = 0.045). Two-way ANOVA and post hoc Tukey's was used as statistical analysis. Data given as mean  $\pm$  SEM.

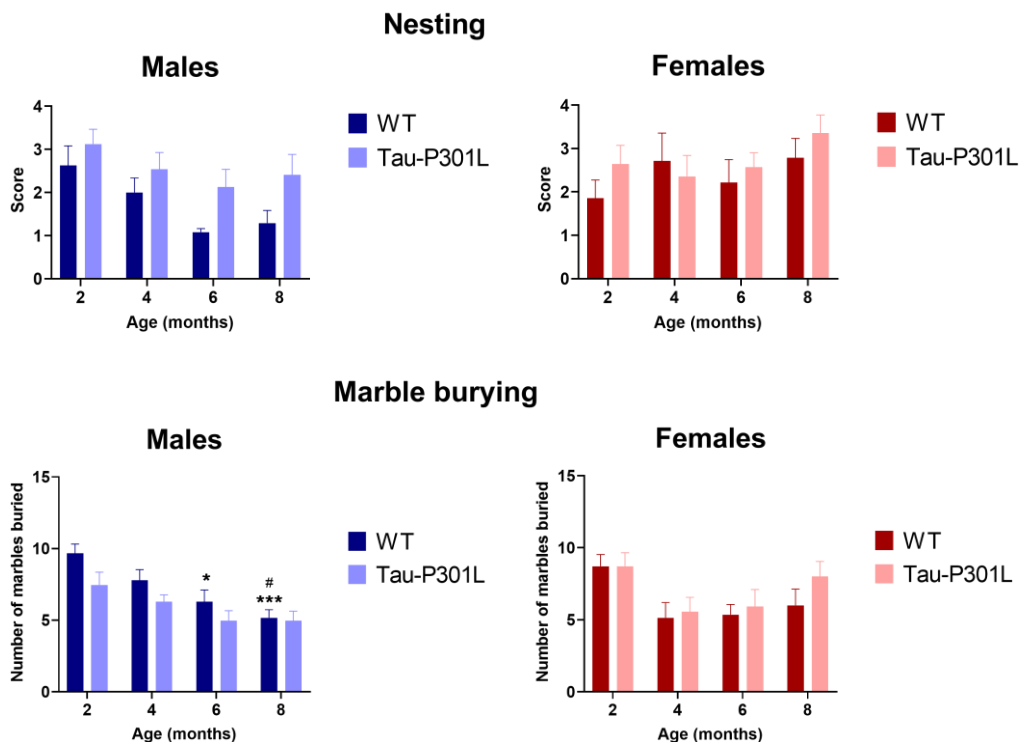

**Figure S2:** Tau-P301L mice had similar performance in the nesting behavior and marble burying test compared to WT mice. No difference was observed between Tau-P301L male mice (n = 12) and age-matched WT male mice (n = 12) regarding the nesting behavior and numbers of marbles buried. Performance of Tau-P301L female mice (n = 7) and age-matched WT female mice (n = 7) was also similar in both tests. Two-way ANOVA was used as statistical

analysis. Data given as mean $\pm$  SEM. \*:  $p = 0.0127$ , \*\*\*:  $p = 0.0002$  compared to 2 months genotype-matched. #:  $p = 0.0236$  compared to 4 months genotype-matched.

**Table S1:** Tau-P301L mice (Tau) had increased scores in different parameters compared to WT starting with 4 months of age in the SHIRPA test battery. Data given as mean± SEM.

| Parameters                     | Score    |         |         |         |          |         |         |         |          |         |         |         |          |         |         |         |
|--------------------------------|----------|---------|---------|---------|----------|---------|---------|---------|----------|---------|---------|---------|----------|---------|---------|---------|
|                                | 2 Months |         |         |         | 4 Months |         |         |         | 6 Months |         |         |         | 8 Months |         |         |         |
|                                | Male     |         | Female  |         | Male     |         | Female  |         | Male     |         | Female  |         | Male     |         | Female  |         |
|                                | WT       | Tau     | WT      | Tau     |
| <b>Restlessness</b>            | 0.0±0.0  | 0.0±0.0 | 0.0±0.0 | 0.0±0.0 | 0.0±0.0  | 0.0±0.0 | 0.0±0.0 | 0.0±0.0 | 0.1±0.1  | 0.1±0.1 | 0.0±0.0 | 0.0±0.0 | 0.0±0.0  | 0.0±0.0 | 0.0±0.0 | 0.0±0.0 |
| <b>Apathy</b>                  | 0.0±0.0  | 0.0±0.0 | 0.0±0.0 | 0.0±0.0 | 0.0±0.0  | 0.0±0.0 | 0.0±0.0 | 0.0±0.0 | 0.0±0.0  | 0.0±0.0 | 0.0±0.0 | 0.0±0.0 | 0.0±0.0  | 0.0±0.0 | 0.0±0.0 | 0.0±0.0 |
| <b>Stereotyped behavior</b>    | 0.0±0.0  | 0.0±0.0 | 0.0±0.0 | 0.0±0.0 | 0.0±0.0  | 0.0±0.0 | 0.0±0.0 | 0.0±0.0 | 0.0±0.0  | 0.0±0.0 | 0.0±0.0 | 0.0±0.0 | 0.0±0.0  | 0.0±0.0 | 0.0±0.0 | 0.0±0.0 |
| <b>Convulsion</b>              | 0.0±0.0  | 0.0±0.0 | 0.0±0.0 | 0.0±0.0 | 0.0±0.0  | 0.0±0.0 | 0.0±0.0 | 0.0±0.0 | 0.0±0.0  | 0.0±0.0 | 0.0±0.0 | 0.0±0.0 | 0.0±0.0  | 0.0±0.0 | 0.0±0.0 | 0.0±0.0 |
| <b>Abnormal body carriage</b>  | 0.0±0.0  | 0.0±0.0 | 0.0±0.0 | 0.0±0.0 | 0.3±0.1  | 0.8±0.1 | 0.0±0.0 | 0.7±0.2 | 0.3±0.1  | 0.9±0.1 | 0.1±0.1 | 0.9±0.1 | 0.1±0.1  | 0.5±0.2 | 0.1±0.0 | 0.4±0.2 |
| <b>Alertness</b>               | 0.0±0.0  | 0.0±0.0 | 0.0±0.0 | 0.0±0.0 | 0.0±0.0  | 0.0±0.0 | 0.1±0.1 | 0.1±0.1 | 0.0±0.0  | 0.2±0.1 | 0.1±0.1 | 0.0±0.0 | 0.1±0.1  | 0.0±0.0 | 0.1±0.1 | 0.0±0.0 |
| <b>Abnormal gait</b>           | 0.0±0.0  | 0.0±0.0 | 0.0±0.0 | 0.0±0.0 | 0.1±0.0  | 0.7±0.2 | 0.0±0.0 | 0.4±0.2 | 0.2±0.1  | 1.3±0.2 | 0.0±0.0 | 0.3±0.2 | 0.1±0.1  | 0.7±0.1 | 0.0±0.0 | 0.4±0.2 |
| <b>Startle response</b>        | 0.2±0.1  | 0.3±0.1 | 0.1±0.1 | 0.1±0.1 | 0.4±0.1  | 0.3±0.1 | 0.0±0.0 | 0.1±0.1 | 0.3±0.1  | 0.3±0.1 | 0.3±0.3 | 0.1±0.1 | 0.0±0.0  | 0.0±0.0 | 0.0±0.0 | 0.0±0.0 |
| <b>Loss of righting reflex</b> | 0.0±0.0  | 0.0±0.0 | 0.1±0.1 | 0.9±0.1 | 0.3±0.1  | 0.7±0.2 | 0.1±0.1 | 0.7±0.4 | 0.3±0.1  | 0.5±0.2 | 0.0±0.0 | 0.9±0.4 | 0.0±0.0  | 0.2±0.1 | 0.0±0.0 | 0.4±0.2 |
| <b>Touch response</b>          | 0.0±0.0  | 0.2±0.1 | 0.0±0.0 | 0.0±0.0 | 0.1±0.1  | 0.7±0.2 | 0.1±0.1 | 0.3±0.2 | 0.1±0.1  | 0.2±0.1 | 0.1±0.1 | 0.1±0.1 | 0.0±0.0  | 0.1±0.1 | 0.0±0.0 | 0.1±0.1 |
| <b>Pinna reflex</b>            | 0.0±0.0  | 0.0±0.0 | 0.0±0.0 | 0.0±0.0 | 0.1±0.1  | 0.3±0.1 | 0.0±0.0 | 0.1±0.1 | 0.1±0.1  | 0.0±0.0 | 0.0±0.0 | 0.1±0.1 | 0.0±0.0  | 0.0±0.0 | 0.0±0.0 | 0.0±0.0 |
| <b>Cornea reflex</b>           | 0.0±0.0  | 0.0±0.0 | 0.0±0.0 | 0.0±0.0 | 0.3±0.1  | 0.3±0.1 | 0.0±0.0 | 0.0±0.0 | 0.2±0.1  | 0.2±0.1 | 0.1±0.1 | 0.3±0.2 | 0.0±0.0  | 0.1±0.1 | 0.0±0.0 | 0.0±0.0 |
| <b>Forelimb placing reflex</b> | 0.1±0.1  | 0.3±0.1 | 0.0±0.0 | 0.1±0.1 | 0.1±0.1  | 0.3±0.1 | 0.0±0.0 | 0.0±0.0 | 0.1±0.1  | 0.4±0.1 | 0.1±0.1 | 0.0±0.0 | 0.2±0.1  | 0.8±0.1 | 0.1±0.1 | 0.6±0.3 |
| <b>Hanging behavior</b>        | 0.2±0.1  | 0.4±0.1 | 0.0±0.0 | 0.3±0.1 | 0.1±0.1  | 0.8±0.3 | 0.0±0.0 | 0.0±0.0 | 0.3±0.1  | 0.8±0.3 | 0.9±0.4 | 0.9±0.3 | 0.3±0.1  | 0.8±0.3 | 0.7±0.2 | 0.7±0.3 |
| <b>Pain response</b>           | 0.1±0.1  | 0.1±0.1 | 0.0±0.0 | 0.0±0.0 | 0.3±0.1  | 0.3±0.1 | 0.0±0.0 | 0.3±0.1 | 0.1±0.1  | 0.4±0.1 | 0.1±0.1 | 0.4±0.2 | 0.0±0.0  | 0.1±0.1 | 0.0±0.0 | 0.0±0.0 |
| <b>Grooming</b>                | 0.0±0.0  | 0.0±0.0 | 0.0±0.0 | 0.0±0.0 | 0.2±0.1  | 0.1±0.1 | 0.0±0.0 | 0.1±0.1 | 0.3±0.2  | 0.3±0.1 | 0.0±0.0 | 0.1±0.1 | 0.0±0.0  | 0.2±0.1 | 0.0±0.0 | 0.1±0.1 |
| <b>Score Sum</b>               | 0.5±0.2  | 1.3±0.3 | 0.3±0.3 | 1.4±0.4 | 2.1±0.2  | 5.2±0.6 | 0.4±0.3 | 3.0±0.4 | 2.1±0.3  | 5.4±0.6 | 2.0±0.4 | 4.1±0.7 | 0.7±0.2  | 3.3±0.4 | 1.1±0.3 | 2.7±0.6 |

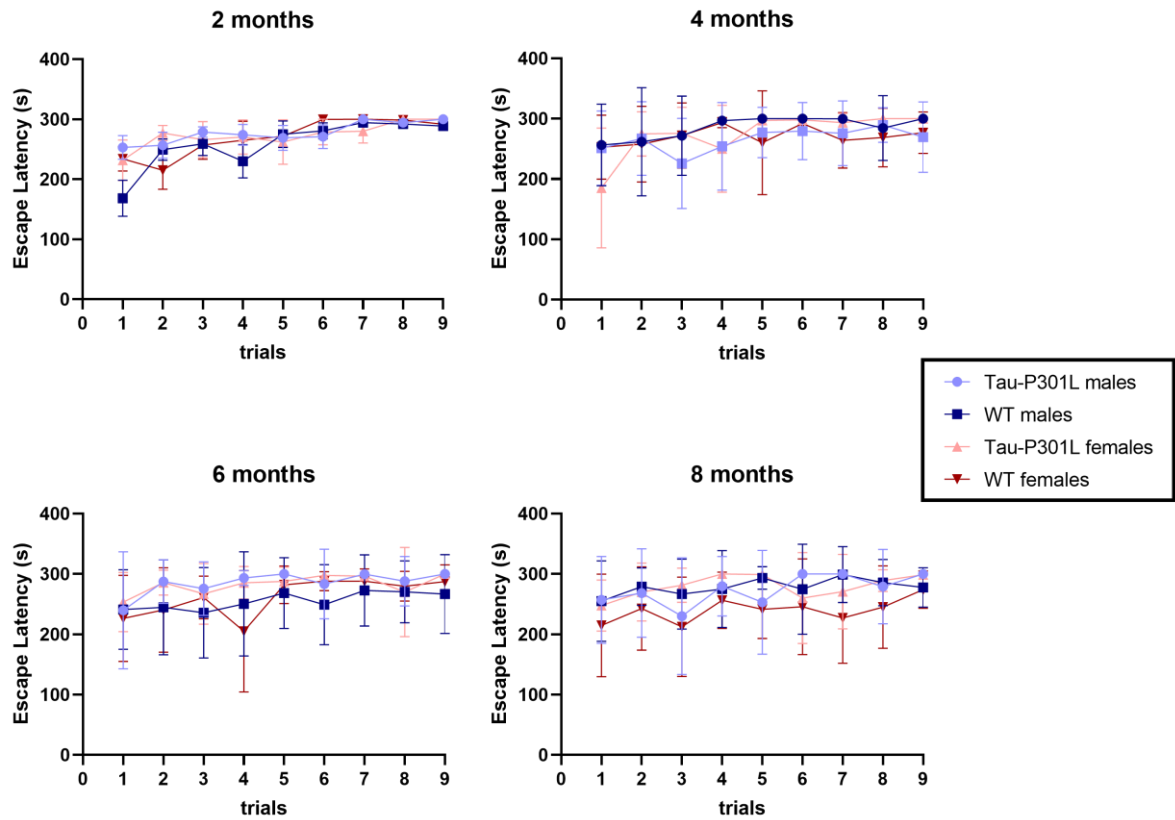

**Figure S3:** Tau-P301L mice had similar performance in the Rotarod test compared to WT mice. No motor deficits were observed in Tau-P301L male mice ( $n = 12$ ) compared to age-matched WT male mice ( $n = 12$ ), as well as in Tau-P301L female mice ( $n = 7$ ) compared to age-matched WT female mice ( $n = 7$ ). Two-way ANOVA was used as statistical analysis. Data given as mean  $\pm$  SEM.

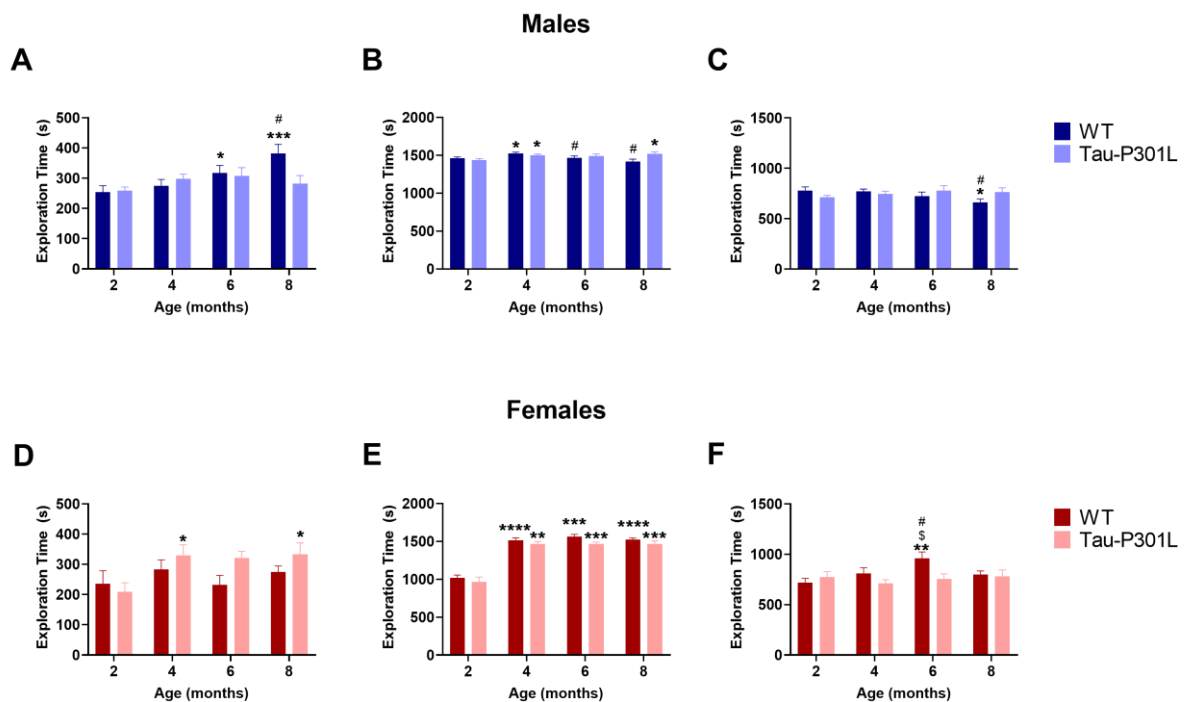

**Figure S4:** Tau-P301L mice spent similar amount of time in the border and center of the open field compared to WT mice. No difference was observed in Tau-P301L male mice (n = 12) compared to age-matched WT male mice (n = 12) as well as in Tau-P301L female mice (n = 7) compared to age-matched WT female mice (n = 7), regarding the time spent in the center (A and D), border (B and E) and corner (C and F) of the open field arena. The two-way ANOVA was used as statistical analysis. Data given as mean  $\pm$  SEM. \*:  $p < 0.05$ , \*\*:  $p < 0.01$ , \*\*\*:  $p = 0.001$  and \*\*\*\*:  $p < 0.0001$  compared to 2 months genotype-matched. #:  $p < 0.05$  compared to 4 months genotype-matched. \$:  $p < 0.05$  compared to 8 months genotype-matched.

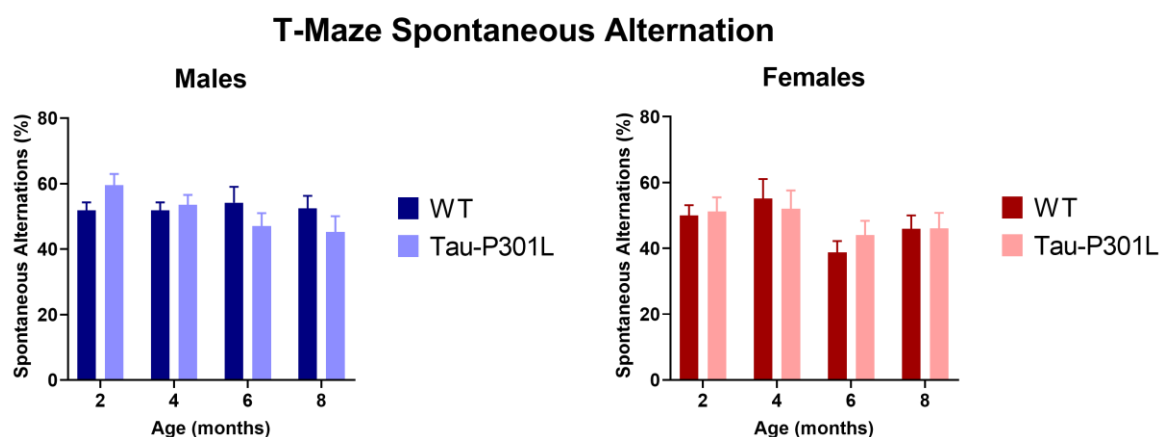

**Figure S5:** Tau-P301L mice had similar performance in the T-maze spontaneous alternation compared to WT mice. Tau-P301L male mice (n = 12) alternated similarly to age-matched WT male mice (n = 12), as well as Tau-P301L female mice (n = 7) compared to age-matched WT female mice (n = 7) in the T-maze spontaneous alternation. Two-way ANOVA was used as statistical analysis. Data given as mean  $\pm$  SEM.

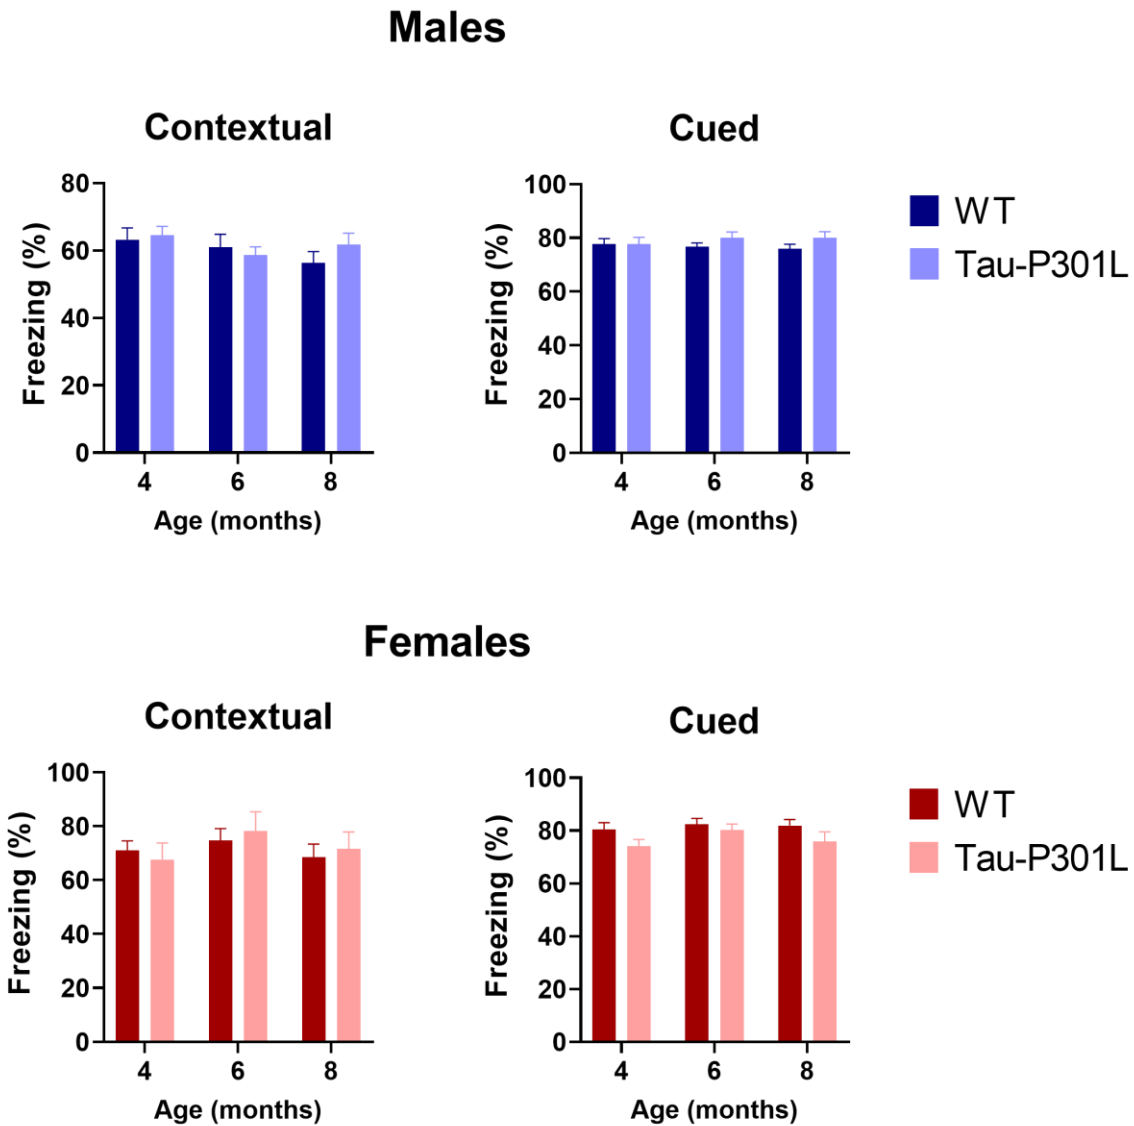

**Figure S6:** Tau-P301L mice froze similarly compared to WT mice in the cued and contextual fear conditioning. Tau-P301L male mice (n = 12) had similar percentage of freezing compared to age-matched WT male mice (n = 12), as well as in Tau-P301L female mice (n = 7) compared to age-matched WT female mice (n = 7) in the cued and contextual fear conditioning. Two- way ANOVA was used as statistical analysis. Data given as mean± SEM.

**Table S2: Correlation between behavioral tests and AT8 as well as AT100 staining.**

|               | AT8                   |                       |                       |                       | AT100                 |                       |                       |                       |
|---------------|-----------------------|-----------------------|-----------------------|-----------------------|-----------------------|-----------------------|-----------------------|-----------------------|
|               | Hindbrain             | Midbrain              | Cerebellum            | Cortex                | Hindbrain             | Midbrain              | Cerebellum            | Cortex                |
| <b>SHIRPA</b> | r = -0.42<br>p = 0.15 | r = -0.013<br>p = 0.5 | r = -0.21<br>p = 0.31 | r = 0.7<br>p = 0.03   | r = 0.33<br>p = 0.43  | r = 0.32<br>p = 0.44  | r = -0.25<br>p = 0.55 | r = 0.1<br>p = 0.81   |
| <b>Pole</b>   | r = 0.39<br>p = 0.17  | r = 0.54<br>p = 0.085 | r = 0.54<br>p = 0.085 | r = -0.15<br>p = 0.36 | r = 0.12<br>p = 0.78  | r = -0.41<br>p = 0.31 | r = -0.13<br>p = 0.76 | r = -0.47<br>p = 0.24 |
| <b>OF</b>     | r = -0.43<br>p = 0.29 | r = -0.14<br>p = 0.73 | r = -0.26<br>p = 0.54 | r = -0.29<br>p = 0.48 | r = -0.38<br>p = 0.35 | r = -0.24<br>p = 0.56 | r = -0.31<br>p = 0.45 | r = -0.15<br>p = 0.72 |
| <b>NOR</b>    | r = -0.22<br>p = 0.6  | r = -0.17<br>p = 0.68 | r = -0.25<br>p = 0.56 | r = 0.25<br>p = 0.56  | r = -0.1<br>p = 0.81  | r = -0.02<br>p = 0.96 | r = -0.12<br>p = 0.77 | r = -0.03<br>p = 0.94 |

r = Spearman correlation coefficient

OF = open field test (locomotion)

NOR = novel object recognition (discrimination index)
